# Supplementary material for: Highly elastic, strong, and reprocessable cross-linked polyolefin elastomers enabled by boronic ester bonds
Source: Royal Society of Chemistry journal article supplement (doi:10.1039/d0py00235f), 2020-01-01
Supplement: d0py00235f1.pdf [file d0py00235f1.pdf]

# Highly Elastic, Strong, and Reprocessable Cross-linked Polyolefin Elastomers

## Enabled by Boronic Ester Bonds

Fei Yang,<sup>†</sup> Li Pan,<sup>†</sup> Zhe Ma,<sup>†,\*</sup> Yahui Lou,<sup>†</sup> Yuanyuan Li,<sup>†</sup> and Yuesheng Li<sup>†,#,\*</sup>

<sup>†</sup>Tianjin Key Laboratory of Composite and Functional Materials, and School of Materials

Science and Engineering, Tianjin University, Tianjin 300072, P.R. China

<sup>#</sup>Collaborative Innovation Center of Chemical Science and Engineering (Tianjin), Tianjin

300072, P. R. China

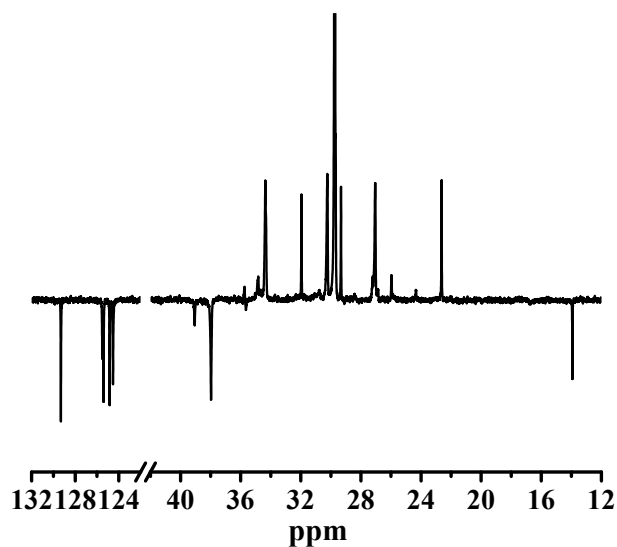

Figure S1. DEPT NMR spectrum in  $o\text{-C}_2\text{D}_2\text{Cl}_4$  of anthracene-containing POE1.3 copolymer.

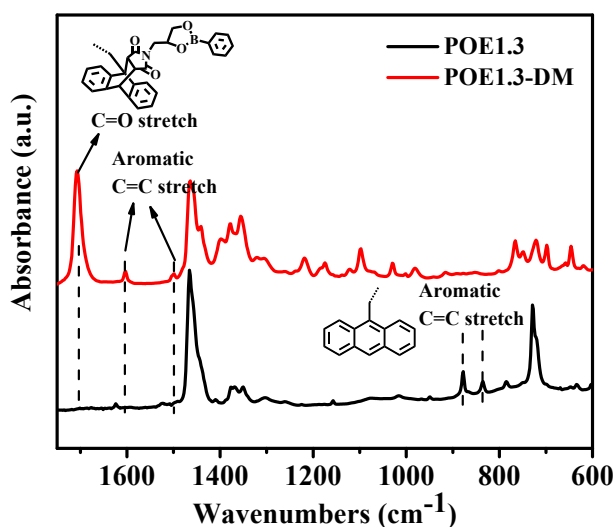

Figure S2. The FTIR spectra of anthracene-containing POE1.3 and POE1.3-DM copolymers.

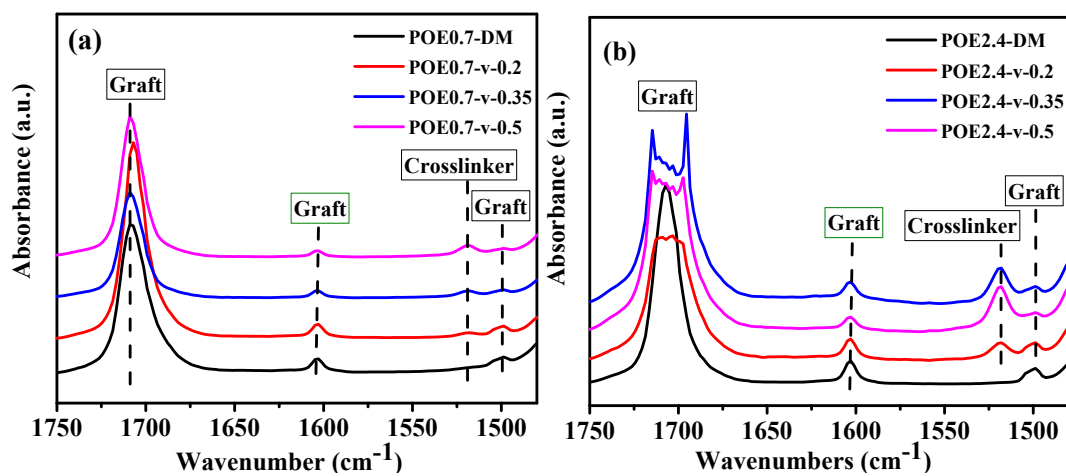

Figure S3. The FTIR spectra of (a) POE0.7-v- $\beta$  and (b) POE2.4-v- $\beta$  vitrimers.

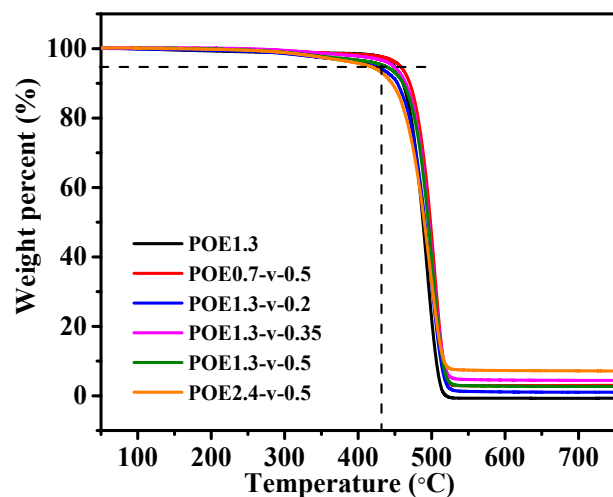

Figure S4. Thermogravimetric analysis of the anthracene-containing POE copolymer and POE $\alpha$ -v- $\beta$  vitrimers.

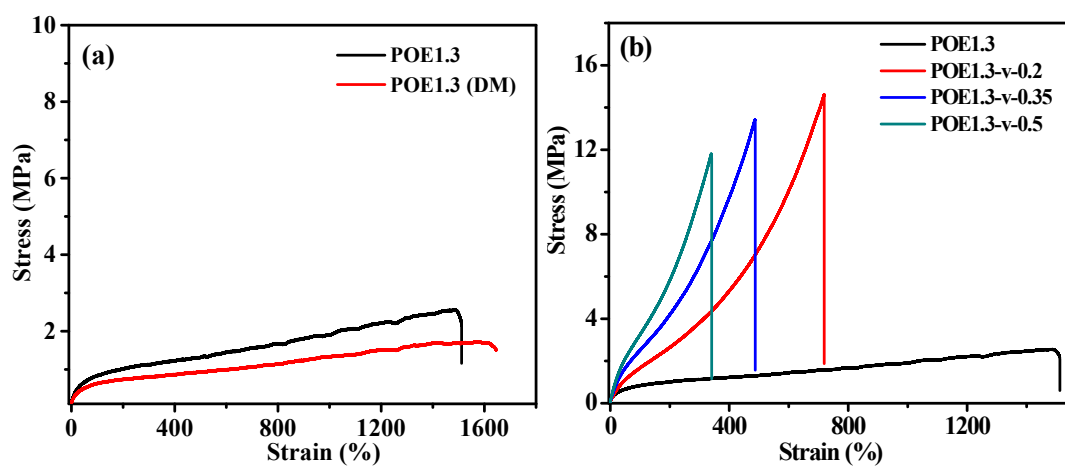

Figure S5. (a) Stress-strain curves of POE1.3 and POE1.3-DM copolymers. (b) Stress-strain curves of POE1.3 copolymer and POE1.3-v- $\beta$  vitrimers.

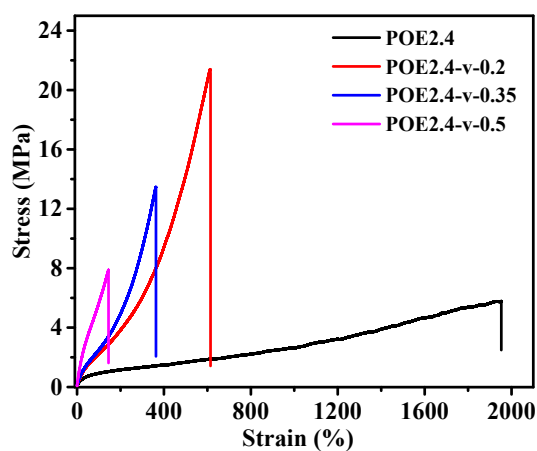

Figure S6. Stress-strain curves of POE2.4 copolymer and POE2.4-v- $\beta$  vitrimers.

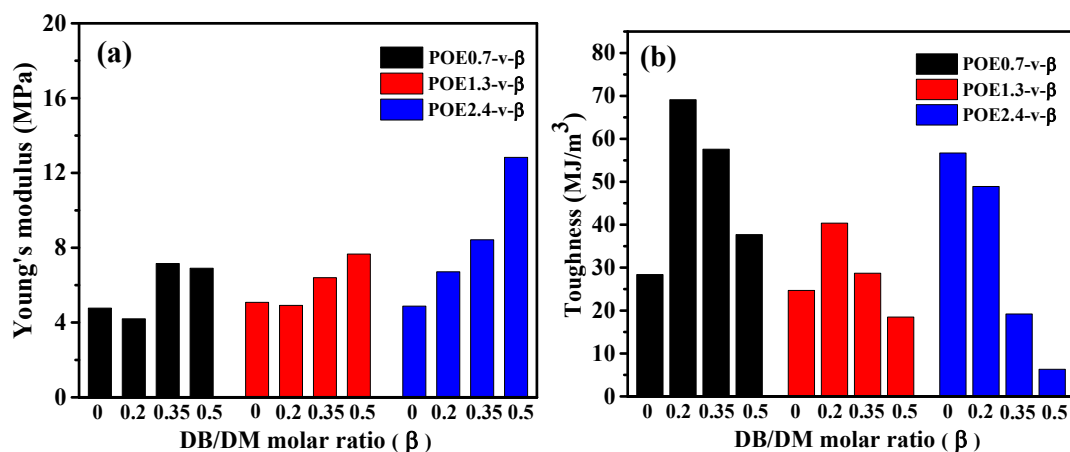

Figure S7. (a) Fracture toughness and (b) Young's modulus of POE $\alpha$  copolymers and POE vitrimers with different DB/DM molar ratio ( $\beta$ ).

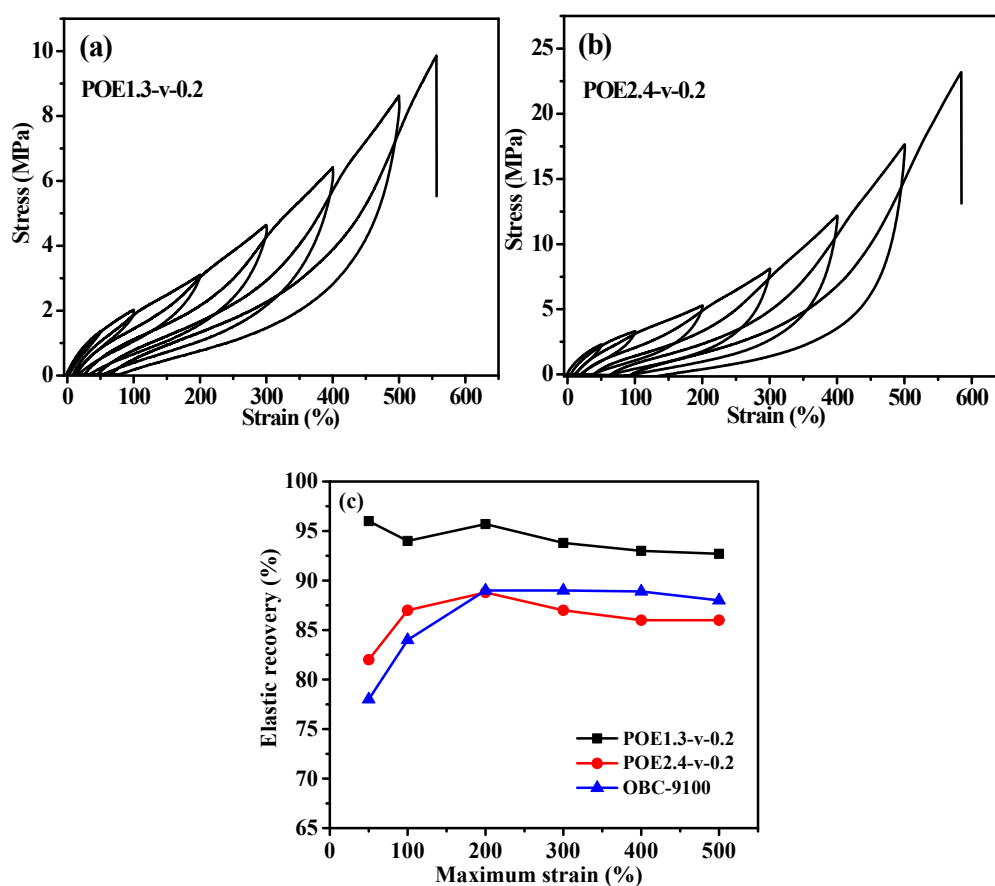

Figure S8. The cyclic tensile test curves of (a) POE1.3-v-0.2 and (b) POE2.4-v-0.2 vitrimers. (c) The elastic recovery values (maximum strain of 500%) of OBC-9100 material, POE1.3-v-0.2 and POE2.4-v-0.2 vitrimers.

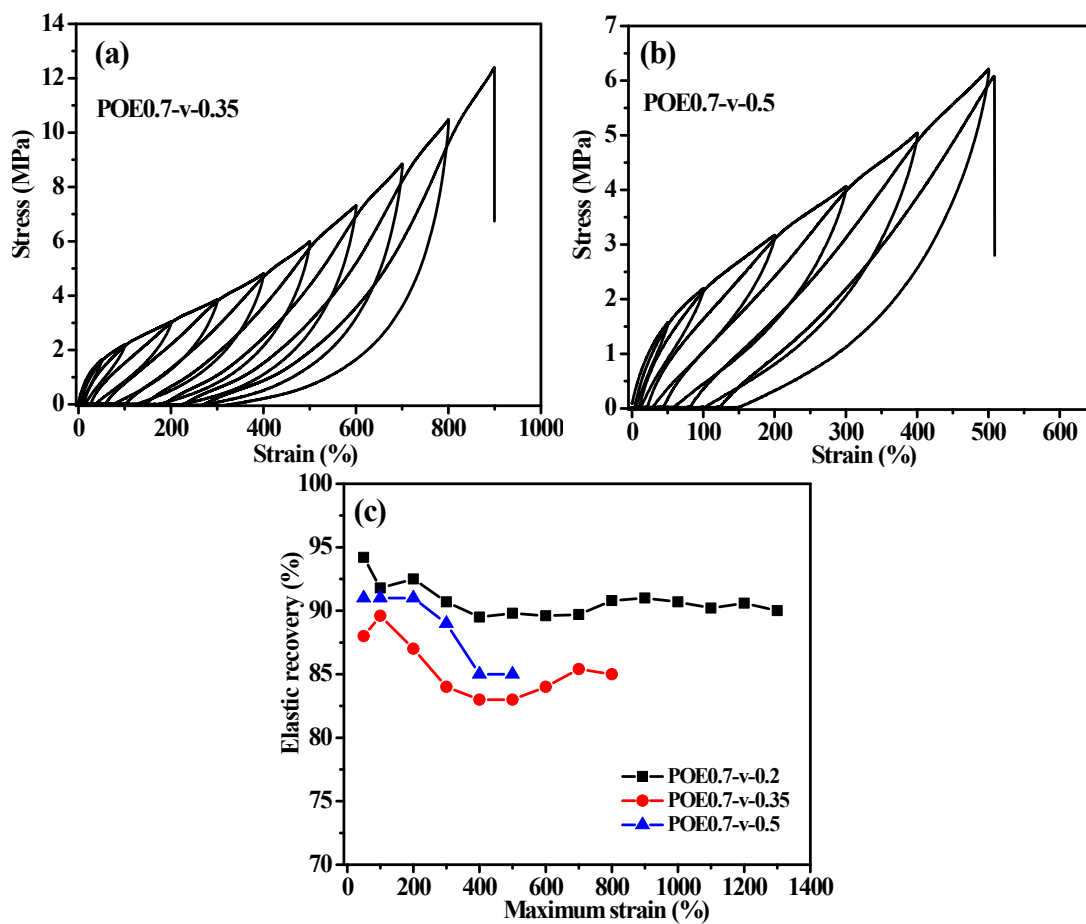

Figure S9. The cyclic tensile test curves of (a) POE0.7-v-0.35 and (b) POE0.7-v-0.5 vitrimers. (c) The elastic recovery values (maximum strain up to break) of POE0.7-v- $\beta$  vitrimers.

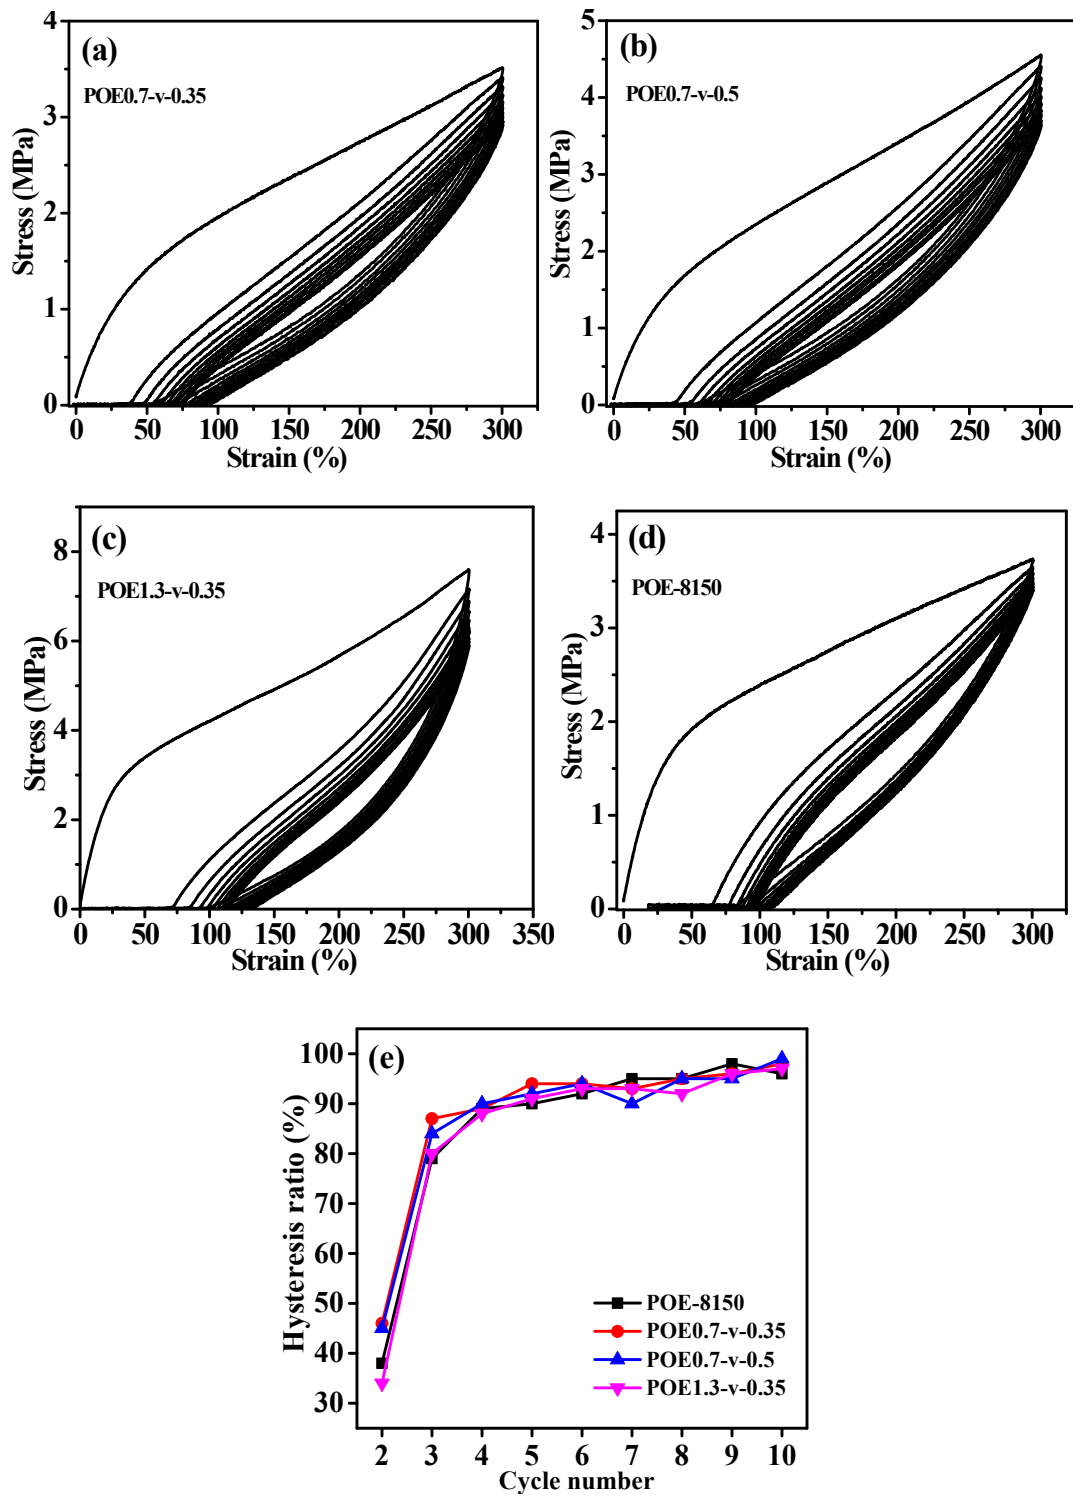

Figure S10. (a-d) Hysteresis test curves of POE $\alpha$ -v- $\beta$  vitrimers and POE-8150 material. (e) The hysteresis ratios calculated from the hysteresis tests.

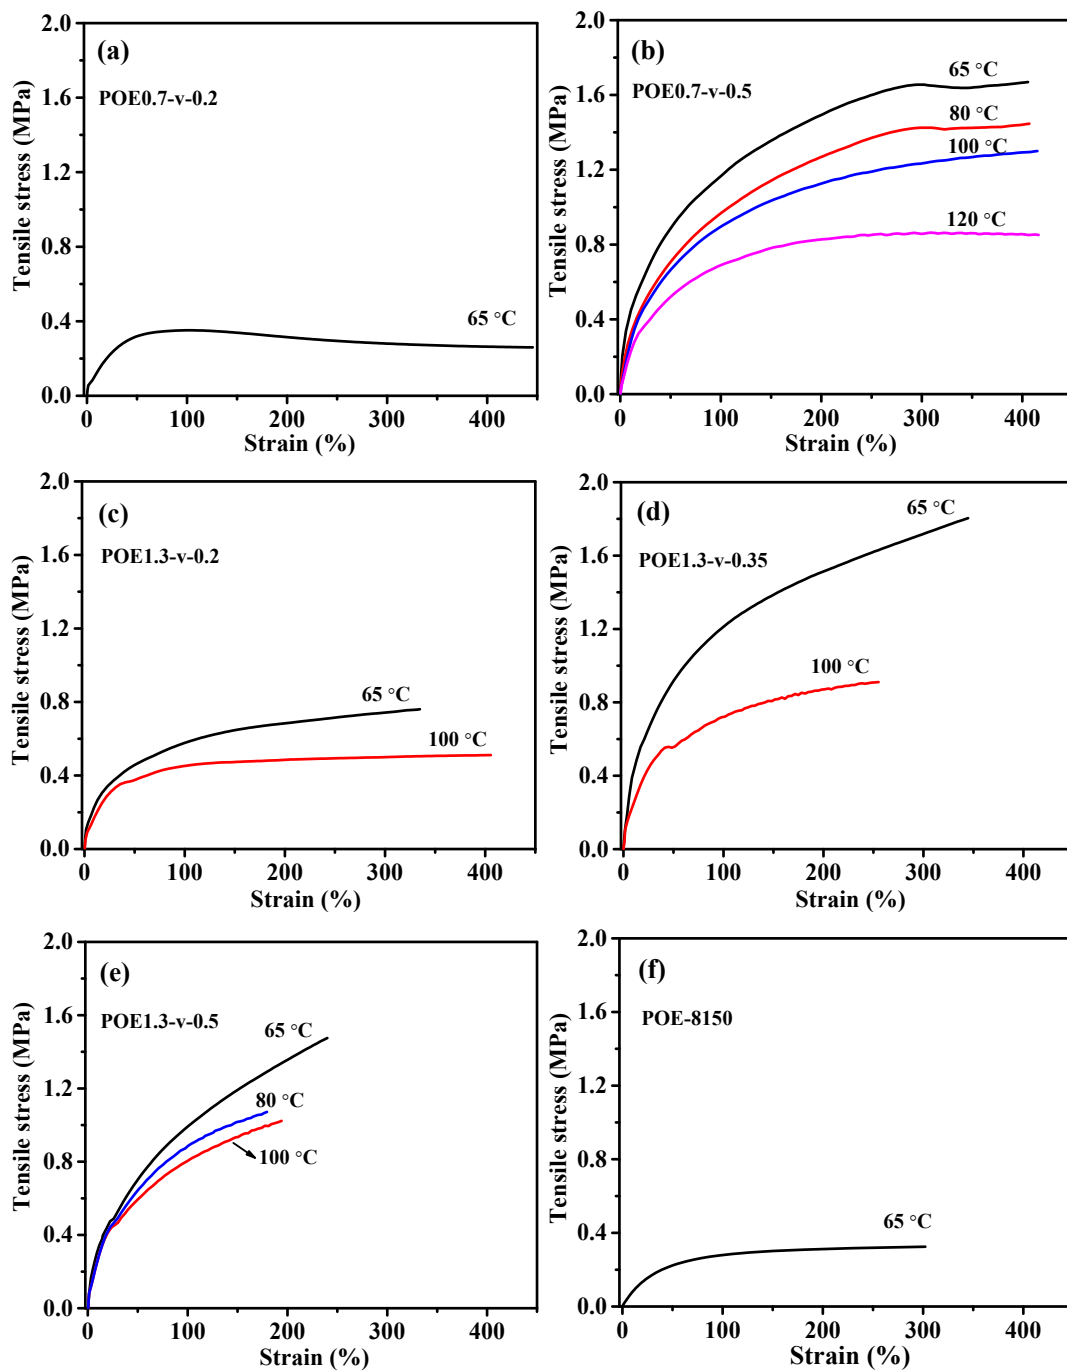

Figure S11. Stress-strain curves of POE vitrimers, POE-8150 and OBC-9100 materials at the strain rate of 100%/min under different temperatures.

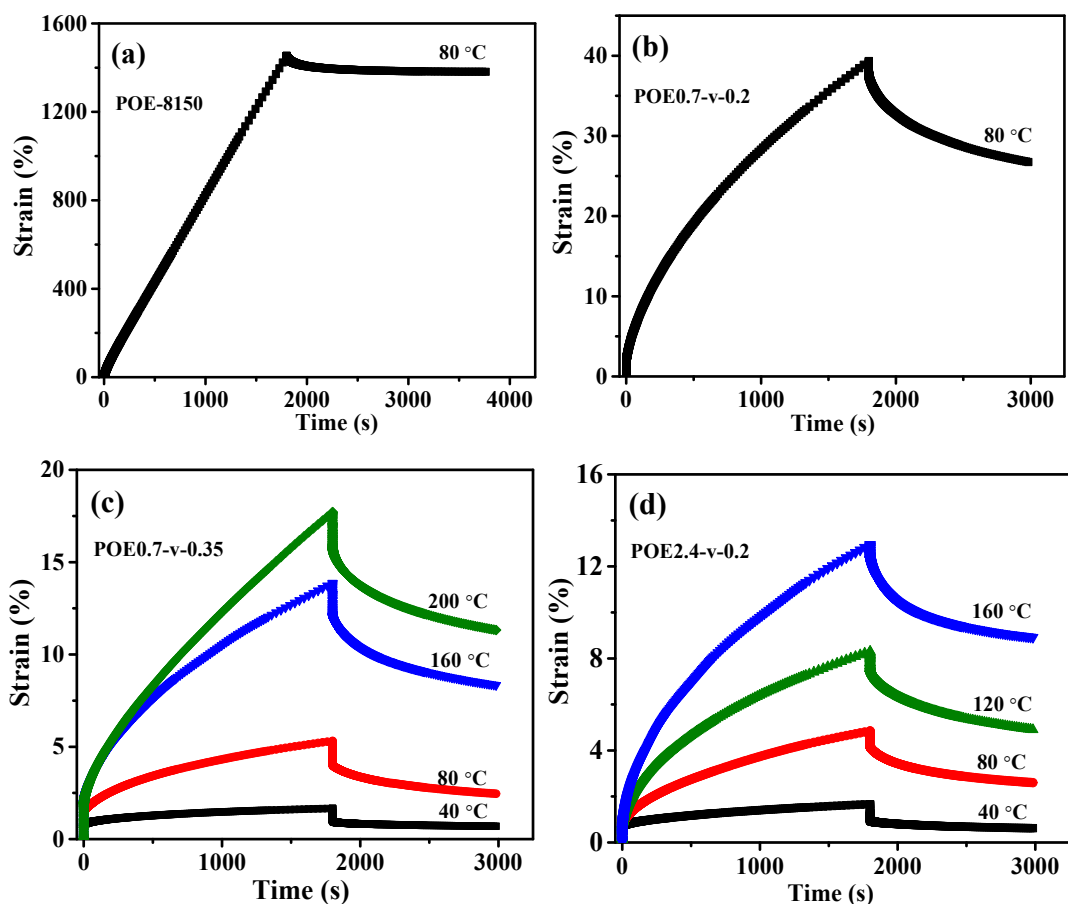

Figure S12. The creep-recovery plots of commercial POE-8150 material and POE $\alpha$ -v- $\beta$  vitrimers under a constant stress of 5000 Pa for 1800 s at different temperatures.

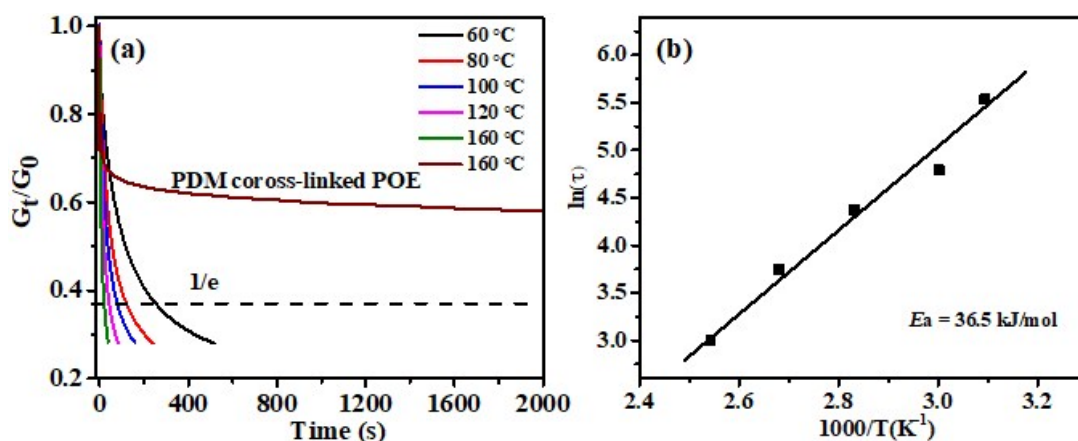

Figure S13. (a) Stress relaxation curves of POE2.4-v-0.35 vitrimer at different temperatures. (b) Arrhenius plot relating the characteristic relaxation time  $\tau$  to temperature.



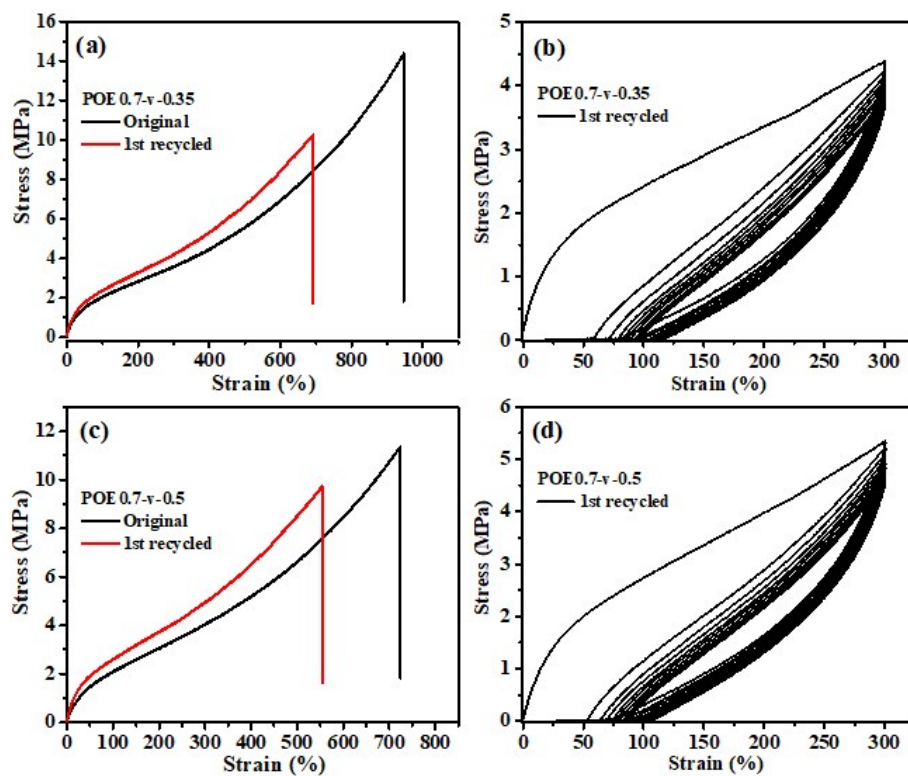

Figure S14. (a), (c) Stress-strain curves of the original and recycled POE0.7-v-0.35 and POE0.7-v-0.5 vitrimers. (b), (d) Hysteresis test curves of the original and recycled POE0.7-v-0.5 and POE0.7-v-0.5 vitrimers.
